# Supplementary material for: Estimated Treatment Effects of Tight Glycaemic Targets in Mild Gestational Diabetes Mellitus: A Multiple Cut-Off Regression Discontinuity Study Design
Source: MDPI journal article supplement (doi:10.3390/ijerph17217725), 2020-10-22
Supplement: s1 [file s1]

Supplementary table: Incidence of Large for Gestational Age (Birth weight >90<sup>th</sup> percentile) Newborns in Women Diagnosed with Gestational Diabetes Mellitus

| HAPO Glucose Composite Score | Events<br>(n) | Number of patients<br>(N) |
|------------------------------|---------------|---------------------------|
| 7                            | 0             | 1                         |
| 8                            | 0             | 4                         |
| 9                            | 0             | 9                         |
| 10                           | 0             | 8                         |
| 11                           | 4             | 31                        |
| 12                           | 1             | 20                        |
| 13                           | 1             | 22                        |
| 14                           | 0             | 20                        |
| 15                           | 0             | 16                        |
| 16                           | 0             | 9                         |
| 17                           | 0             | 7                         |
| 18                           | 0             | 4                         |
| 19                           | 1             | 1                         |
